# Supplementary material for: Low Dose Organochlorine Pesticides and Polychlorinated Biphenyls Predict Obesity, Dyslipidemia, and Insulin Resistance among People Free of Diabetes
Source: PubMed Central journal article supplement (PMC3027626; doi:10.1371/journal.pone.0015977), 2011-01-26

Figure S1. Means of year 20 BMI, triglyceride, HDL-cholesterol, and HOMA-IR according to quartiles of selected organochlorine pesticides which showed  $P_{\text{trend}} < 0.1$  or  $P_{\text{quadratic}} < 0.1$  in Tables 1 to 5. Adjusted for age, sex, race, BMI, triglycerides, and total cholesterol at year 2. Year 20 HDL-cholesterol and HOMA-IR were additionally adjusted for their baseline values at year 2 and year 7, respectively. (Note that triglycerides means are nearly coincident for hexachlorobenzene and p,p'-DDE.)

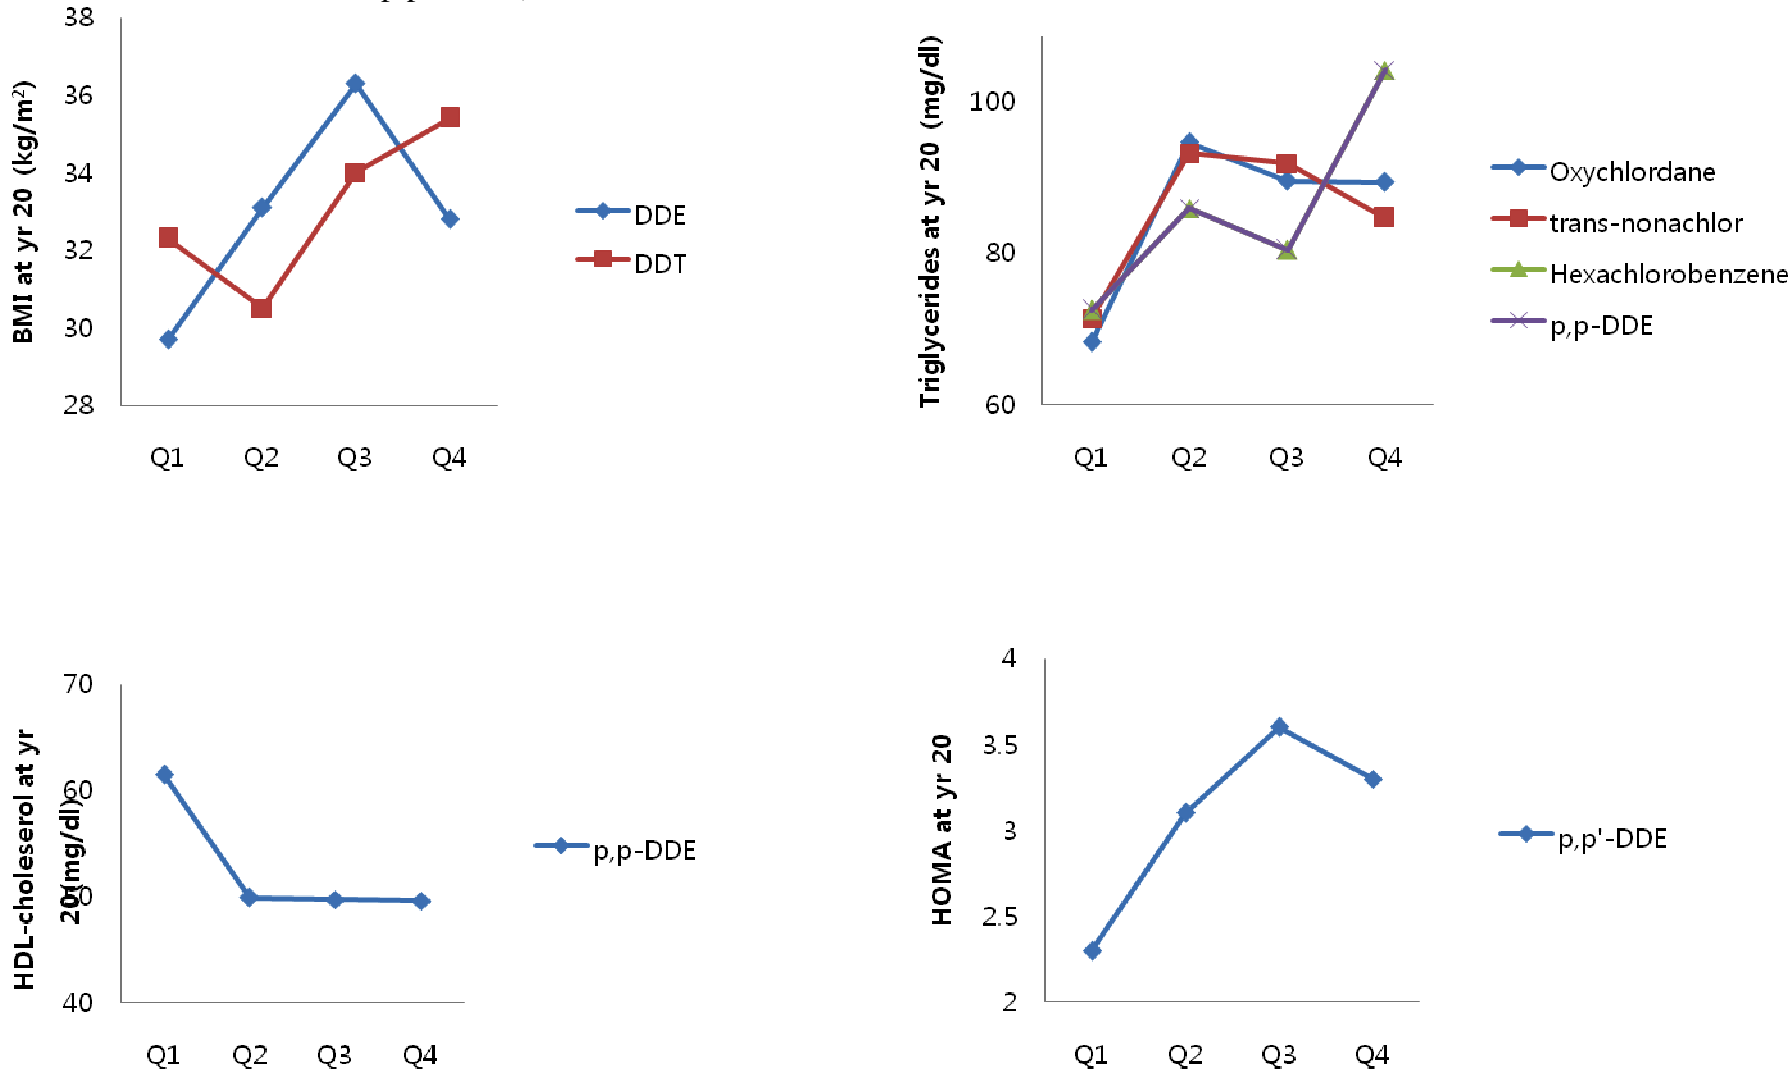

Supplement: pone.0015977.s001.pdf [file pone.0015977.s001.pdf]
